# Supplementary material for: Electrochemical reconstruction of metal–organic gels into crystalline oxy-hydroxide heterostructures for efficient oxygen evolution electrocatalysis
Source: Royal Society of Chemistry journal article supplement (doi:10.1039/d4sc05799f), 2024-01-01
Supplement: d4sc05799f1.pdf [file d4sc05799f1.pdf]

**Electrochemical reconstruction of metal-organic gels into crystalline oxyhydroxide heterostructures for efficient oxygen evolution electrocatalysis**

Kang Liu,<sup>a</sup> Haikuo Lan,<sup>a</sup> Yuting Chen,<sup>a</sup> Weicheng Tang,<sup>a</sup> Zhenyu Xiao,<sup>a</sup> Yunmei Du,<sup>b</sup> Jun Xing,<sup>a</sup> Zexing Wu,<sup>a</sup> Lei Wang,<sup>\* a</sup>

a Prof. K. Liu, H. Lan, Y. Chen, W. Tang, Prof. Z. Xiao, Prof. Y. Du, Prof. J. Xing, Prof. Z. Wu, Prof. L. Wang

Key Laboratory of Eco-chemical Engineering, International Science and Technology Cooperation Base of Eco-chemical Engineering and Green Manufacturing, College of Chemistry and Molecular Engineering, School of Materials Science and Engineering, Qingdao University of Science and Technology  
Qingdao 266042, P. R. China

b Prof. Y. Du

College of Environment and Safety Engineering, Qingdao University of Science and Technology  
Qingdao 266042, P. R. China

Email: inorchemwl@126.com

## **Material Preparation**

### **Materials**

The H<sub>5</sub>L was drawn from previously reported literature.<sup>1</sup> KOH (99%), CoCl<sub>2</sub>·6H<sub>2</sub>O (99%), FeCl<sub>3</sub>·6H<sub>2</sub>O (99%) and NiCl<sub>2</sub>·6H<sub>2</sub>O (99%) were purchased from Aladdin. RuO<sub>2</sub> (99%), commercial 20% Pt/C and triethylamine (99%) were purchased from Macklin. Nafion™ perfluorinated resin solution (5 wt%) was purchased from Sigma-Aldrich. The electrodes used in the tests were purchased from Shanghai Chenhua Instruments. All reagents used were of analytical grade and did not require further purification.

### **Characterization instrumentation**

X-ray diffraction (XRD) measurements were conducted using a Rigaku X-ray diffractometer. Fourier transform infrared (FT-IR) spectral data were obtained in the 4000-400 cm<sup>-1</sup> range utilizing KBr particles on a Nicolet 460 spectrophotometer. The Brunauer-Emmett-Teller (BET) specific surface area was determined with using an ASAP 2460 instrument. X-ray photoelectron spectroscopy (XPS) analysis was carried out with an ESCALAB 250Xi instrument, where the spectrum was calibrated against the C 1s peak at 284.6 eV. Surface morphology and structure were characterized using a ZEISS Sigma 500 scanning electron microscope (SEM), JEM-ARM200F NEOARM atomic-level resolution transmission electron microscope (TEM) and high-resolution transmission electron microscopy (HRTEM) images were captured with a JEM2100UHR. Thermogravimetric analysis (TGA) was performed by heating the samples from 40 °C to 1000 °C at a rate of 10 °C min<sup>-1</sup> using an STA 449 instrument. In-situ Raman spectra were recorded with a Raman spectroscopy system (Invia Qontor) using a 532 nm wavelength. The element distribution was characterized by ICP-MS2000B.

### **Electrochemical measurement**

Weigh 5 mg of the prepared catalyst, add 600 μL of isopropanol and 400 μL of distilled water, and sonicate for 1 hour. Then, incorporate 20 μL of 5 wt% Nafion™ per fluorinated resin solution to create a uniform mixture of catalyst ink.

The preparation of the RuO<sub>2</sub> electrode follows the same procedure as the catalysts mentioned earlier.

Electrochemical tests were conducted using a CHI 760E electrochemical workstation with a three-electrode setup consisting of a polished glassy carbon electrode (GCE) (working electrode), a saturated calomel electrode (SCE) (reference electrode) and a platinum sheet (counter electrode) to evaluate the OER and HER performance of the catalysts in a 1 M KOH solution. On the central mirror of the GCE (3 mm in diameter), 5  $\mu$ L of catalyst ink (loading of 0.35 mg cm<sup>-2</sup>) was dropped and dried at room temperature. All potentials were converted to the reversible hydrogen electrode (RHE) via using the formula:  $E_{RHE} = E_{SCE} + 0.059 * pH$ . The polarization curve depicted in the figure was adjusted using another formula:  $E_{Correct} = E_{RHE} - IR (95\%)$ , where  $I$  is the measured current and  $R$  is the resistance of the solution (~9.3  $\Omega$ ).

Twenty cyclic voltammetry (CV) tests were conducted at a scan rate of 50 mV s<sup>-1</sup> within the voltage range of 0~0.6 V to activate the electrode. The Linear sweep voltammetry (LSV) curve for OER was generated at a scan rate of 5 mV s<sup>-1</sup> in an O<sub>2</sub>-saturated 1 M KOH solution (1 M KOH solution saturated with N<sub>2</sub> for HER). Tafel plots were obtained by plotting ( $\eta$ ) against the logarithm of current density ( $j$ ) based on the LSV curves. The double-layer specific capacitance ( $C_{dl}$ ) was calculated to estimate the electrochemically active surface area (ECSA) by performing CV tests at scan rates ranging from 2 to 10 mV s<sup>-1</sup> within the non-Faraday region of 1.12~1.22 V. Electrochemical impedance spectra (EIS) were measured in the frequency range of 100 kHz~0.01 Hz at a current density of 10 mA cm<sup>-2</sup> to determine the catalyst resistance. To evaluate overall water splitting, the catalyst ink was applied onto two pieces of nickel foam with equal loading, assembled into a two-electrode cell (cathode and anode), and tested in 1 M KOH solution. The total charge per unit time passing through the system was calculated using Faraday's law:

$$\text{Faradic efficiency} = (nF \cdot m)/Q,$$

$$n = 4 \text{ for OER} (2 \text{ for HER}),$$

$$F = 96485.3 \text{ A s mol}^{-1}, Q = It.$$

### **Computational Methods:**

Spin-polarized theoretical calculations were carried out with density functional theory (DFT) method as implemented in the Vienna Ab Initio Simulation Package (VASP).<sup>2</sup> The electron ion interaction was described with the projector augmented wave (PAW) method,<sup>3</sup> while the electron exchange and correlation energy were solved within the generalized gradient approximation with the revised Perdew-Burke-Ernzerhof (RPBE) exchange-correlation functional.<sup>4-5</sup> The empirical correction in Grimme's method (DFT+D3) was used to describe van der Waals interaction,<sup>6</sup> and the dipole correction was employed to correct potential spurious terms arising from the asymmetry of the slabs.<sup>7</sup> The kinetic energy cutoff of plane wave was set to be 500 eV and the convergence criterion for the residual forces and total energies were set to be 0.05 eV Å<sup>-1</sup> and 10<sup>-5</sup> eV, respectively. A 2×1 supercell slab of (100) edge was constructed containing four-atomic-layers. A vacuum layer of 25 Å was set between the periodically repeated slabs to avoid strong interactions and a 3×7×1 Monkhorst-Pack k-point grids was used to sample the Brillouin zone.

The Gibbs free energy change ( $\Delta G$ ) of each elementary step was calculated by using the computational hydrogen electrode (CHE) model proposed by Nørskov et al.<sup>8</sup> In this model, the chemical potential of the proton-electron pair in an aqueous solution is related to that of one-half of the chemical potential of an isolated hydrogen molecule. The  $\Delta G$  value can be obtained by the formula:  $\Delta G = \Delta E + \Delta ZPE - T\Delta S$ , where  $\Delta E$  is the reaction energy of reactant and product species adsorbed on the catalyst directly obtained from DFT calculations;  $\Delta ZPE$  and  $\Delta S$  are the changes between the adsorbed species and the gas phase molecules in zero-point energies and entropy at 298.15 K, which can be calculated from the vibrational frequencies.

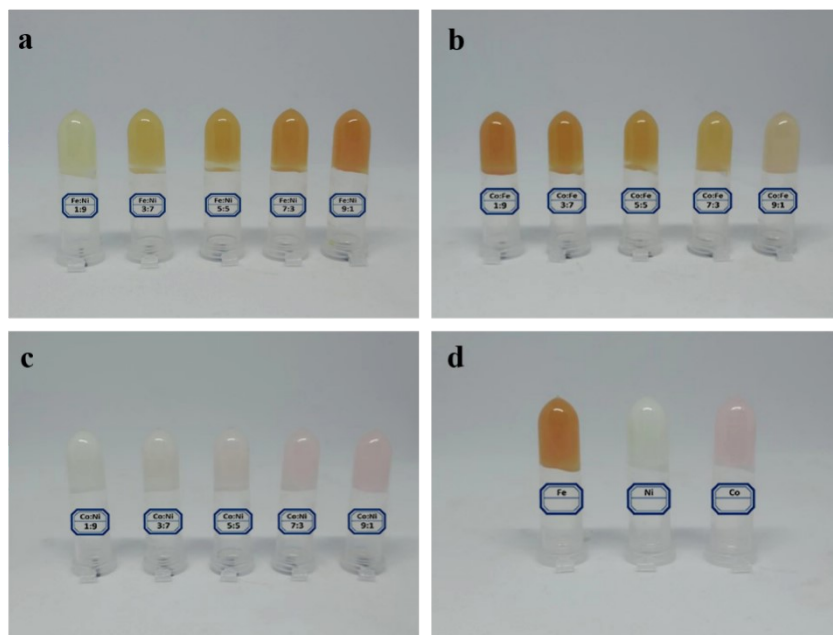

**Fig. S1** Photograph of MOGs: a)  $\text{Fe}_1\text{Ni}_9\sim\text{Fe}_9\text{Ni}_1$ -MOG, b)  $\text{Co}_1\text{Fe}_9\sim\text{Co}_9\text{Fe}_1$ -MOG, c)  $\text{Co}_1\text{Ni}_9\sim\text{Co}_9\text{Ni}_1$ -MOG, d) Fe, Ni and Co-MOG.

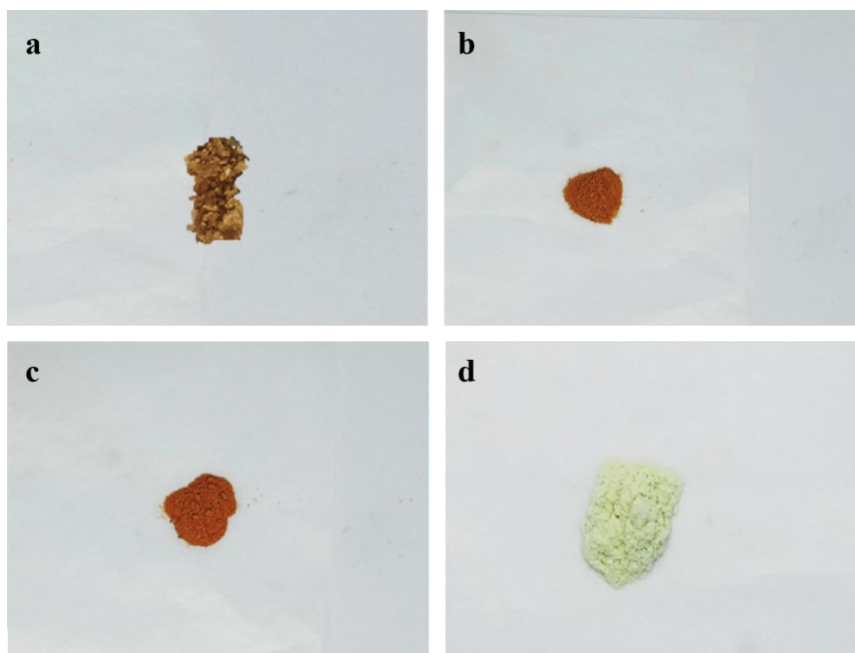

**Fig. S2** Photograph of a) Re-Fe<sub>5</sub>Ni<sub>5</sub>-MOG, b) freeze-dried Fe<sub>5</sub>Ni<sub>5</sub>-MOG, c) freeze-dried Fe-MOG, d) freeze-dried Ni-MOG.

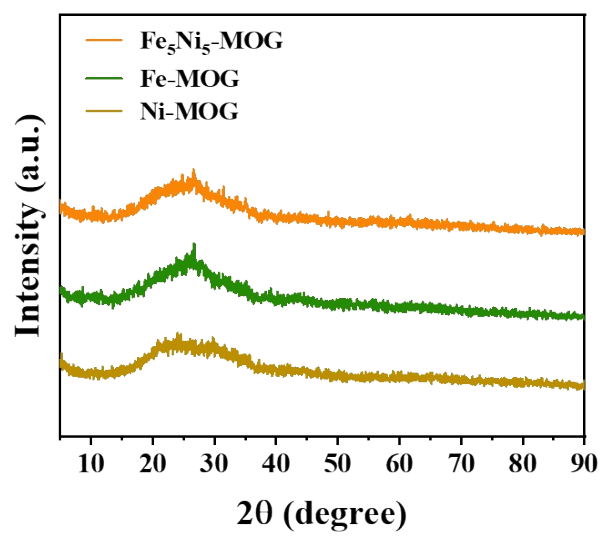

**Fig. S3** XRD patterns of Fe<sub>5</sub>Ni<sub>5</sub>-MOG, Fe-MOG and Ni-MOG.

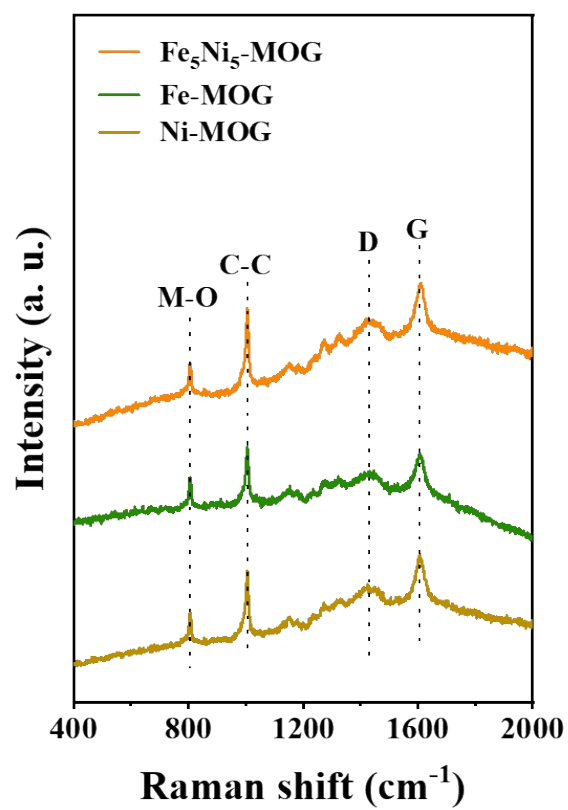

**Fig. S4** The ex-situ Raman pattern of Fe<sub>5</sub>Ni<sub>5</sub>-MOG, Fe-MOG and Ni-MOG.



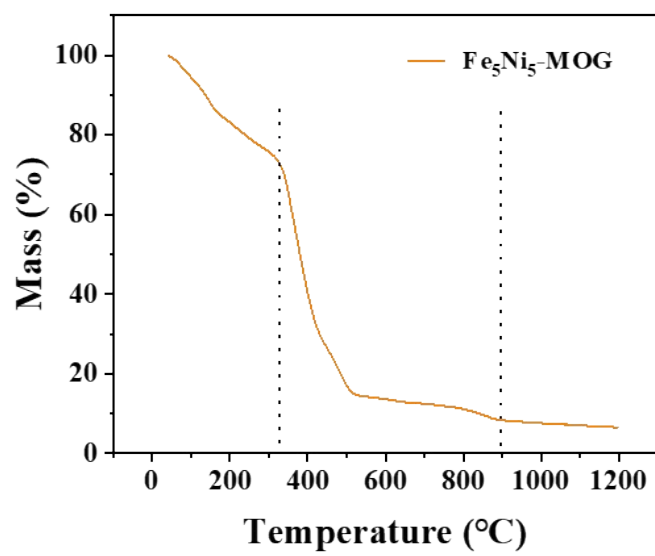

**Fig. S5** TGA curves of Fe<sub>5</sub>Ni<sub>5</sub>-MOG.

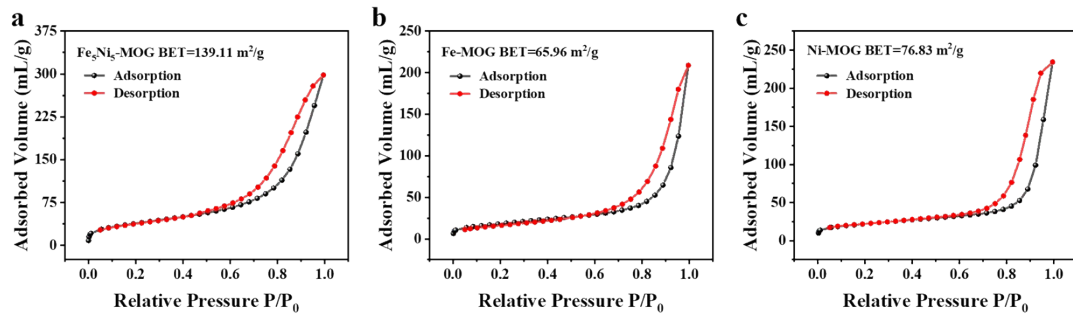

**Fig. S6**  $\text{N}_2$  adsorption-desorption isotherms of a)  $\text{Fe}_5\text{Ni}_5\text{-MOG}$ , b)  $\text{Fe-MOG}$ , c)  $\text{Ni-MOG}$ .

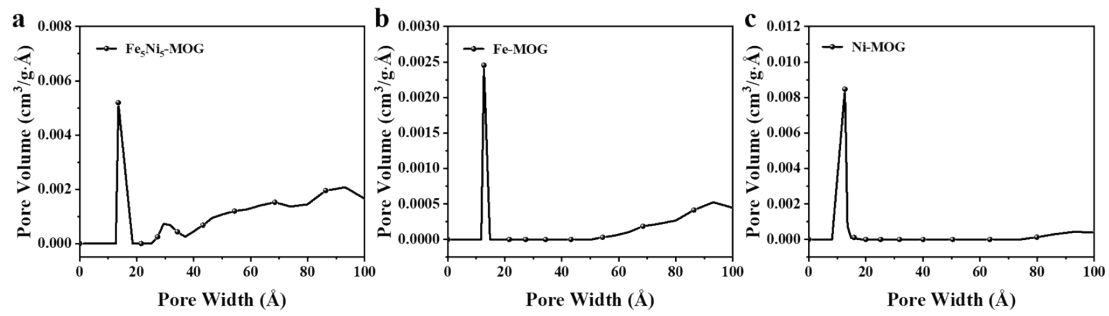

**Fig. S7** Pore size distributions of a) Fe<sub>5</sub>Ni<sub>5</sub>-MOG, b) Fe-MOG, c) Ni-MOG.

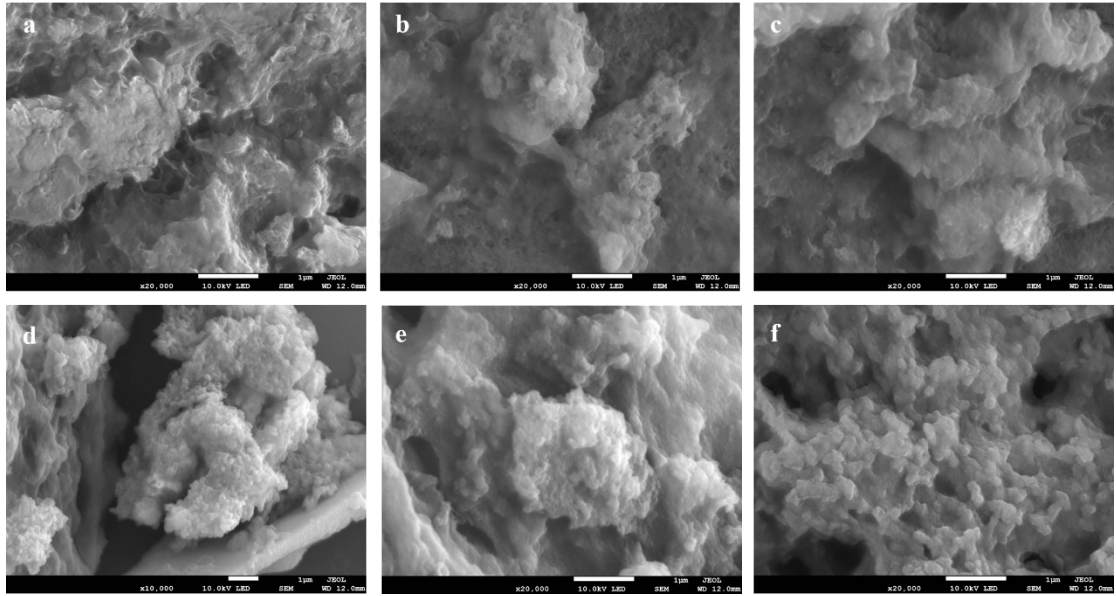

**Fig. S8** SEM images with different magnifications of a-c) Fe-MOG, b-f) Ni-MOG.

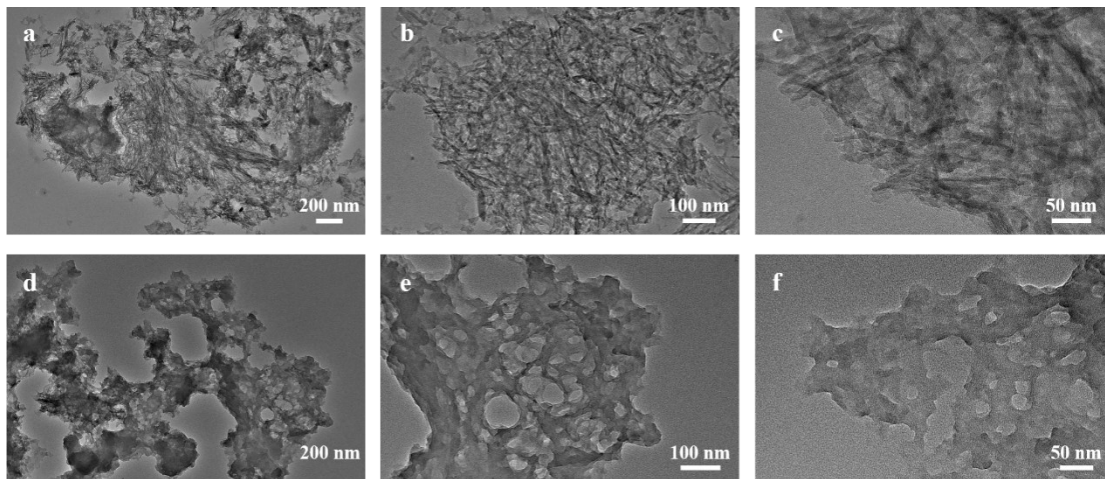

**Fig. S9** TEM images with different magnifications of a-c) Fe-MOG, b-f) Ni-MOG.

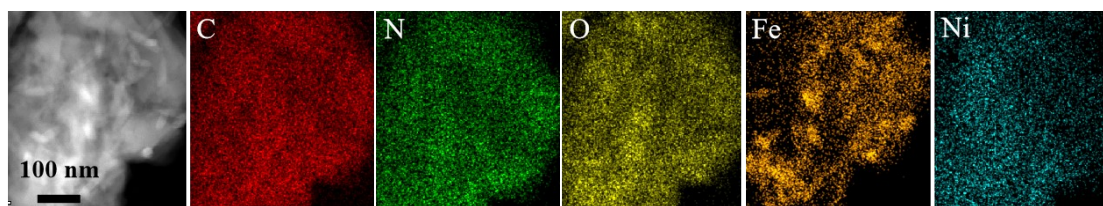

**Fig. S10** HAADF-STEM image and corresponding elemental mapping images of  $\text{Fe}_5\text{Ni}_5\text{-MOG}$ . Scale bar: 100 nm.

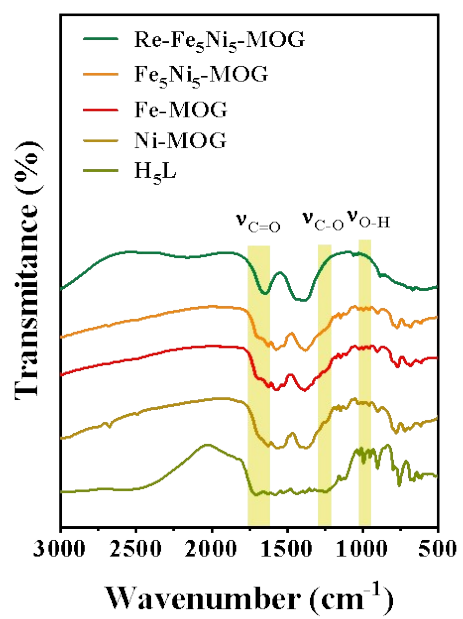

**Fig. S11** FT-IR spectra of Re- $\text{Fe}_5\text{Ni}_5$ -MOG,  $\text{Fe}_5\text{Ni}_5$ -MOG, Fe-MOG, Ni-MOG and  $\text{H}_5\text{L}$ .

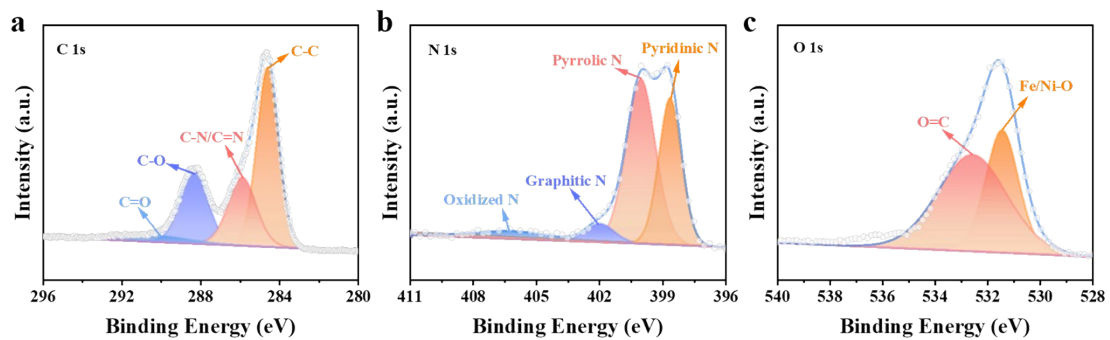

**Fig. S12** High-resolution XPS spectra a) C 1s, b) N 1s, c) O 1s of Fe<sub>5</sub>Ni<sub>5</sub>-MOG.



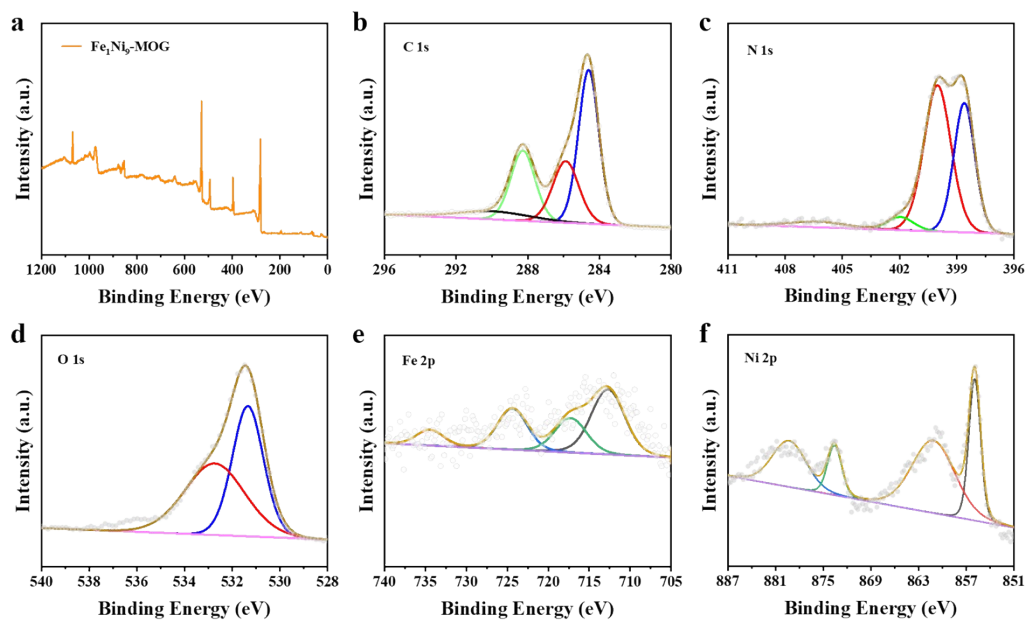

**Fig. S13** a) High-resolution XPS full survey spectra of Fe<sub>1</sub>Ni<sub>9</sub>-MOG. b) C 1s, c) N 1s, d) O 1s, e) Fe 2p and f) Ni 2p of Fe<sub>1</sub>Ni<sub>9</sub>-MOG.

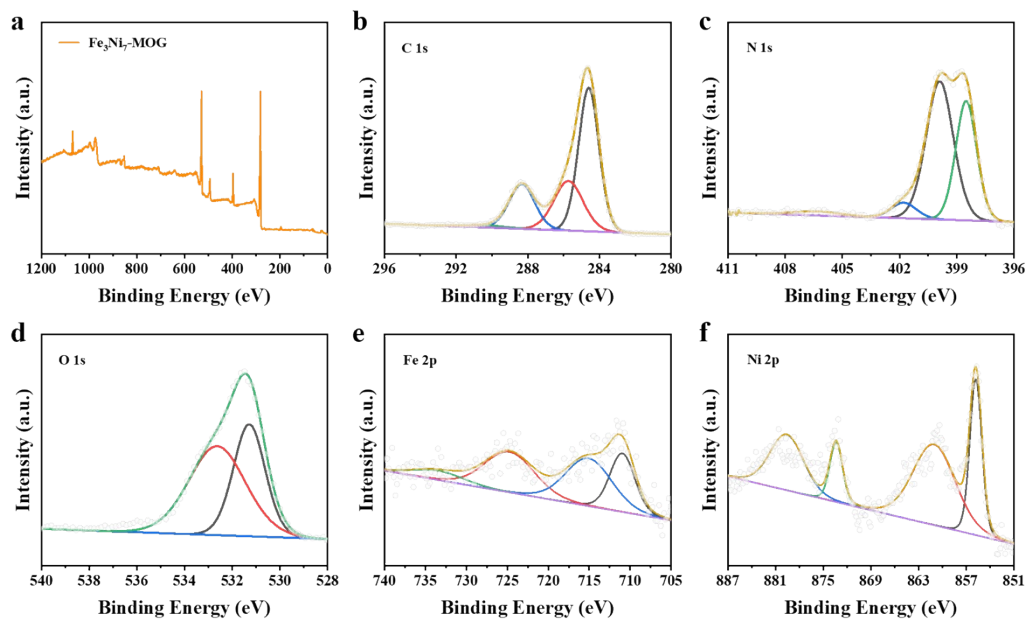

**Fig. S14** a) High-resolution XPS full survey spectra of Fe<sub>3</sub>Ni<sub>7</sub>-MOG. b) C 1s, c) N 1s, d) O 1s, e) Fe 2p and f) Ni 2p of Fe<sub>3</sub>Ni<sub>7</sub>-MOG.

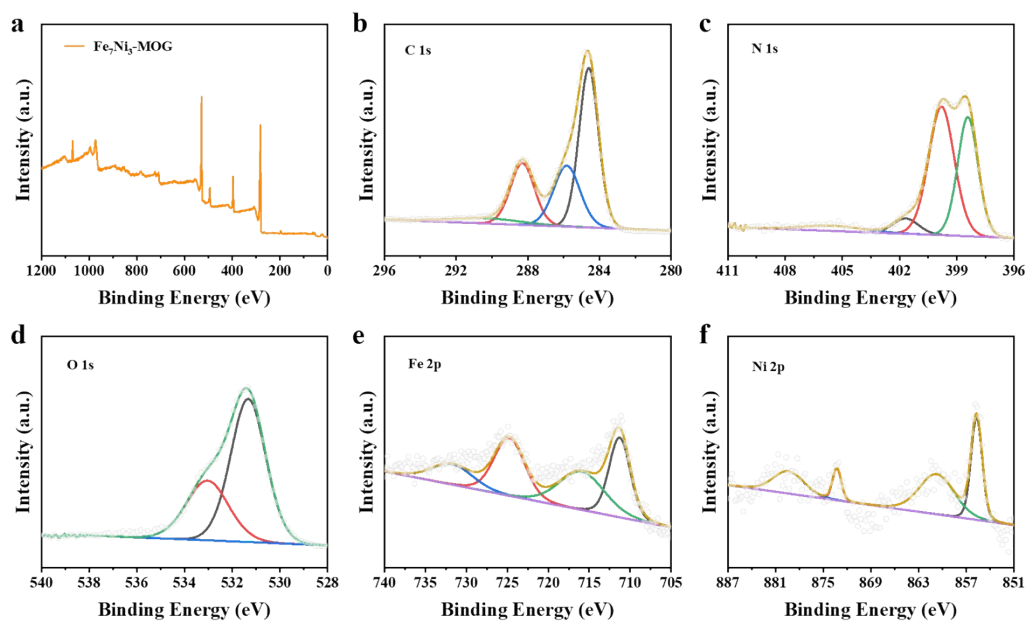

**Fig. S15** a) High-resolution XPS full survey spectra of Fe<sub>7</sub>Ni<sub>3</sub>-MOG. b) C 1s, c) N 1s, d) O 1s, e) Fe 2p and f) Ni 2p of Fe<sub>7</sub>Ni<sub>3</sub>-MOG.

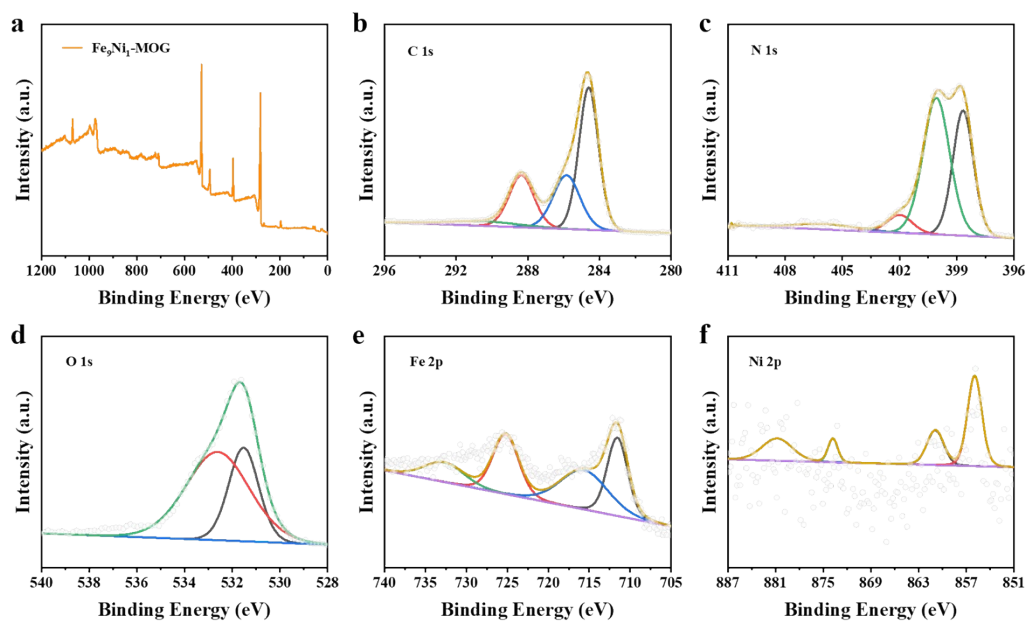

**Fig. S16** a) High-resolution XPS full survey spectra of Fe<sub>9</sub>Ni<sub>1</sub>-MOG. b) C 1s, c) N 1s, d) O 1s, e) Fe 2p and f) Ni 2p of Fe<sub>9</sub>Ni<sub>1</sub>-MOG.

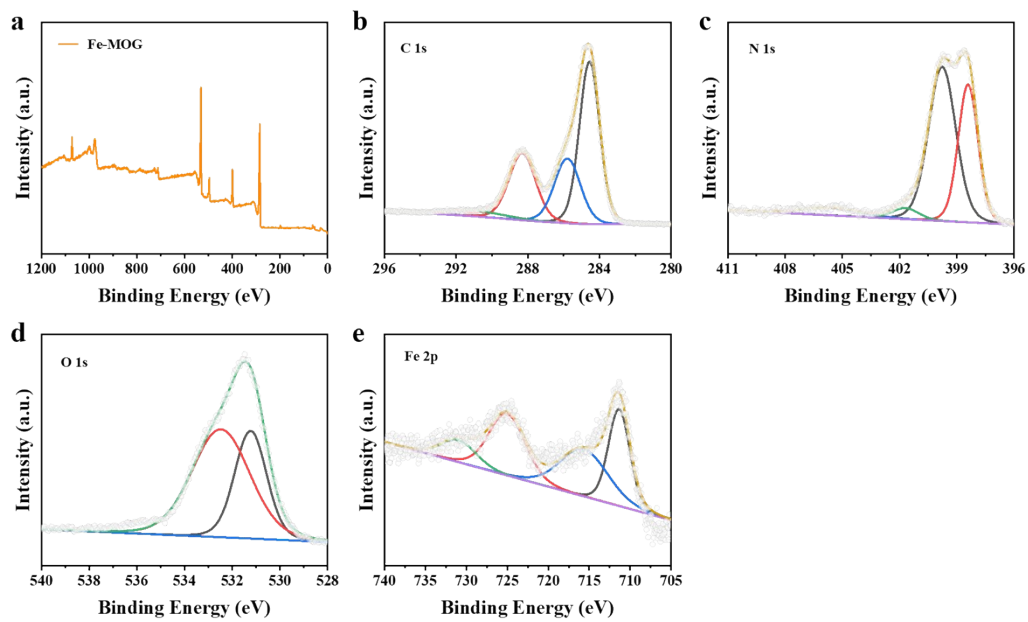

**Fig. S17** a) High-resolution XPS full survey spectra of Fe-MOG. b) C 1s, c) N 1s, d) O 1s and e) Fe 2p of Fe-MOG.

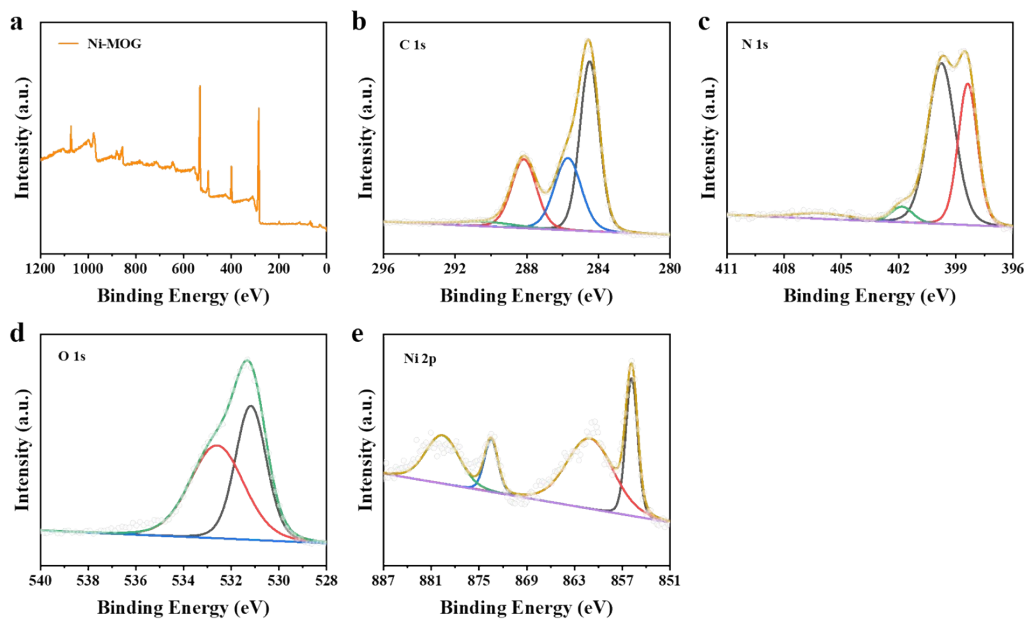

**Fig. S18** a) High-resolution XPS full survey spectra of Ni-MOG. b) C 1s, c) N 1s, d) O 1s and e) Ni 2p of Ni-MOG.

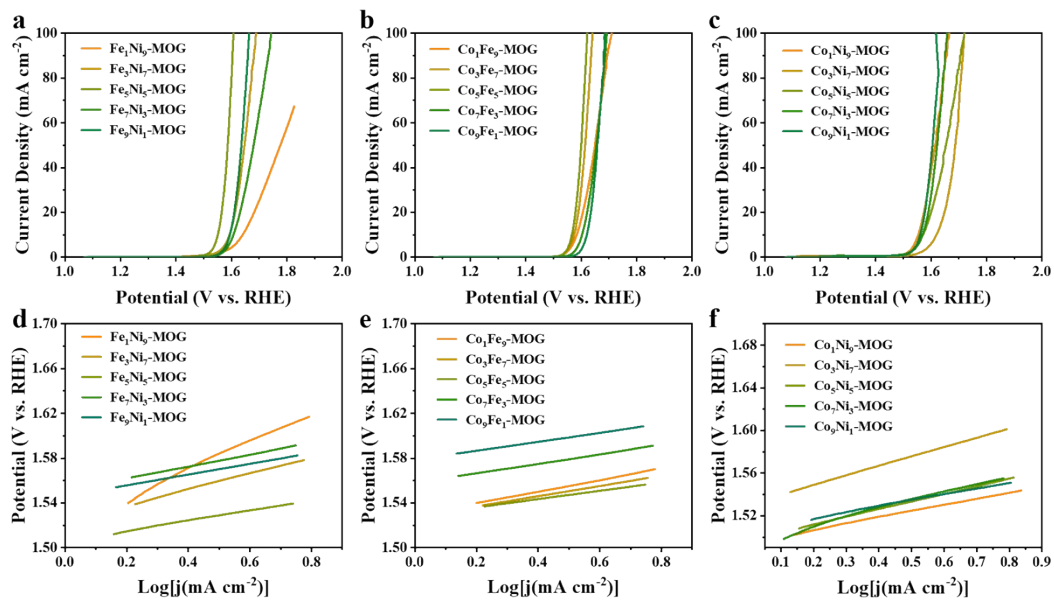

**Fig. S19** LSV curves of a) Fe<sub>1</sub>Ni<sub>9</sub>~Fe<sub>9</sub>Ni<sub>1</sub>-MOG, b) Co<sub>1</sub>Fe<sub>9</sub>~Co<sub>9</sub>Fe<sub>1</sub>-MOG, c) Co<sub>1</sub>Ni<sub>9</sub>~Co<sub>9</sub>Ni<sub>1</sub>-MOG. Tafel plots of d) Fe<sub>1</sub>Ni<sub>9</sub>~Fe<sub>9</sub>Ni<sub>1</sub>-MOG, e) Co<sub>1</sub>Fe<sub>9</sub>~Co<sub>9</sub>Fe<sub>1</sub>-MOG, f) Co<sub>1</sub>Ni<sub>9</sub>~Co<sub>9</sub>Ni<sub>1</sub>-MOG.

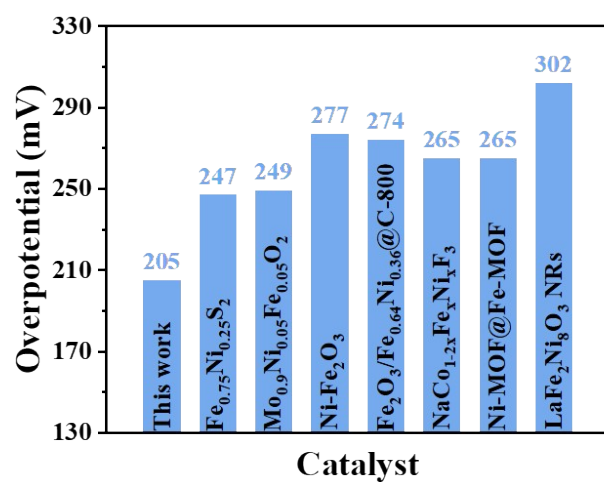

**Fig. S20** Comparison for OER activity of Re- $\text{Fe}_5\text{Ni}_5\text{-MOG}$  with some well-studied electrocatalyst in 1 M KOH.



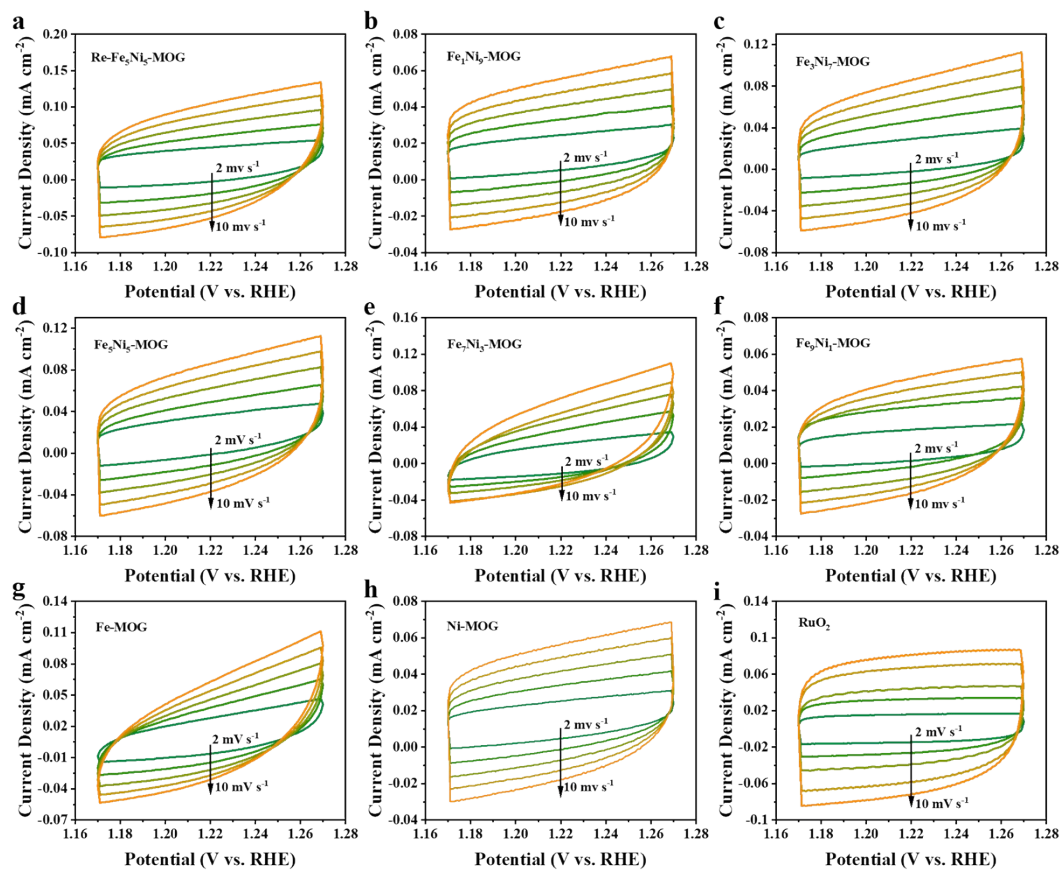

**Fig. S21** CV curves at various scan rates (2~10 mV s<sup>-1</sup>).

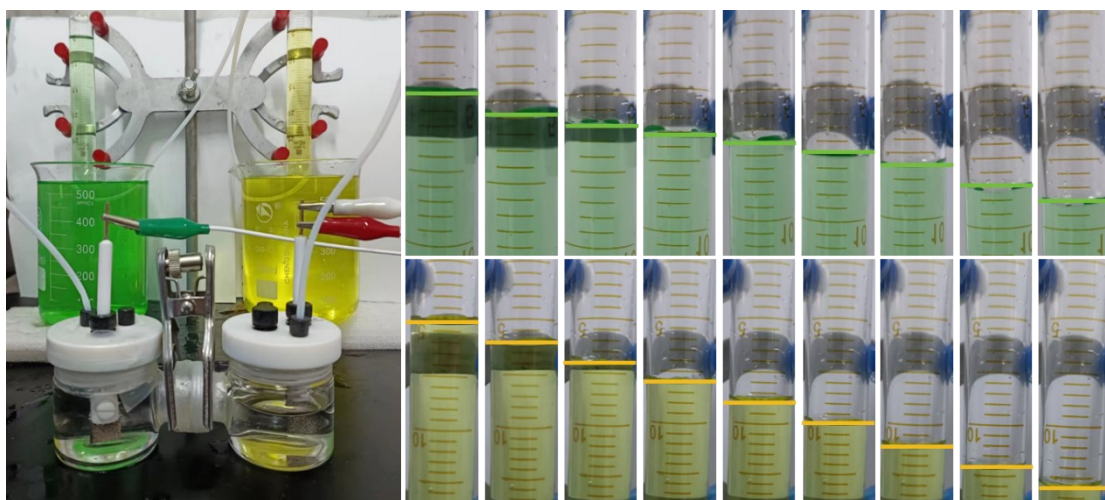

**Fig. S22** Actual gas production using the drainage method during the overall water splitting ( $H_2$  and  $O_2$ ).

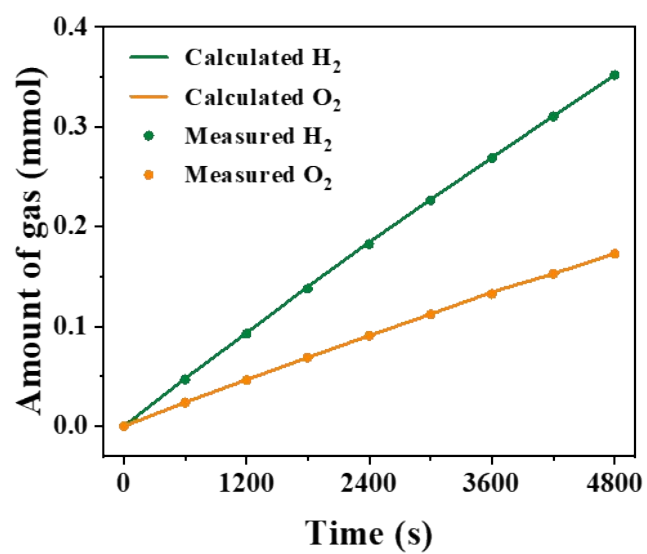

**Fig. S23** Volume of Measured O<sub>2</sub>, H<sub>2</sub> and calculated O<sub>2</sub>, H<sub>2</sub> for Re-Fe<sub>5</sub>Ni<sub>5</sub>-MOG at the current density of 20 mA cm<sup>-2</sup>.

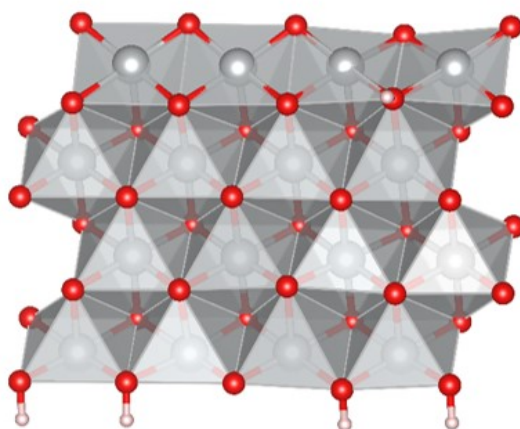

**Fig. S24** Atomic model of NiOOH (Silvery balls: Ni atoms; Red balls: O atoms; White balls: H atoms).

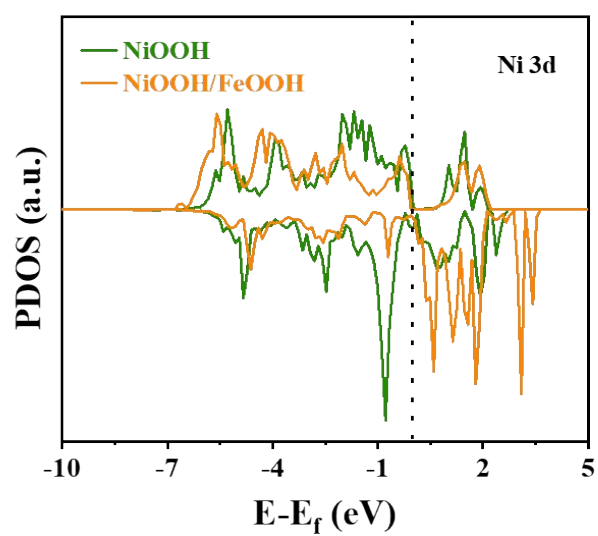

**Fig. S25** The partial density of states (PDOS) of Ni 3d orbital for NiOOH and NiOOH/FeOOH.

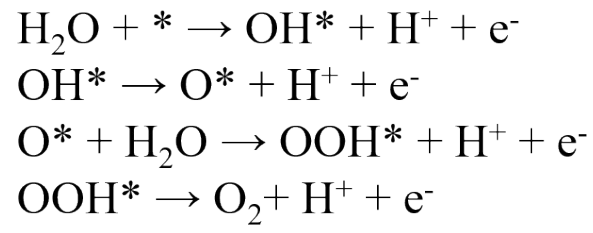

**Fig. S26** Electron reaction paths for the single site of OER in NiOOH. Where \* represents the active sites and OH\*, O\* and OOH\* are the adsorbed intermediates.

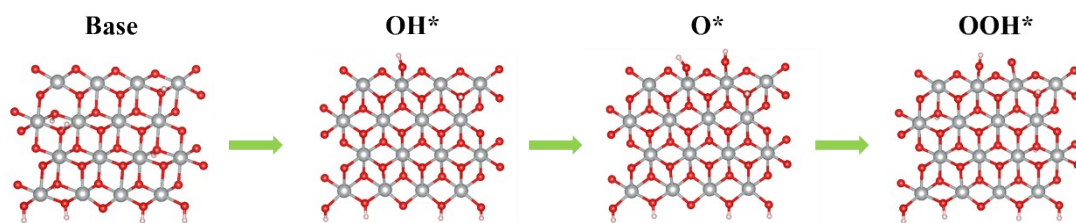

**Fig. S27** Side view of the NiOOH model and the adsorbed OH\*, O\* and OOH\* intermediates on the Ni site of NiOOH model (Silvery balls: Ni atoms; Red balls: O atoms; White balls: H atoms).

(a)

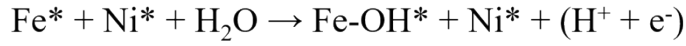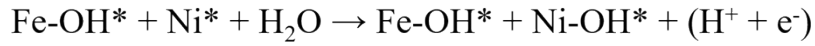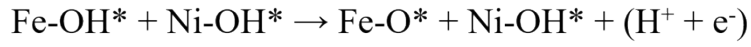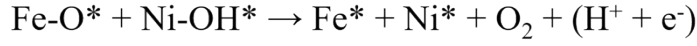

(b)

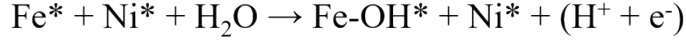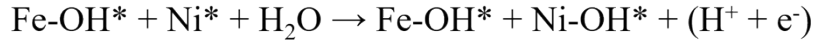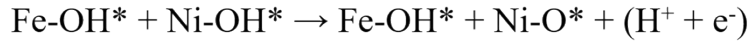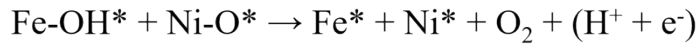

(c)

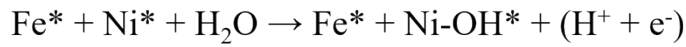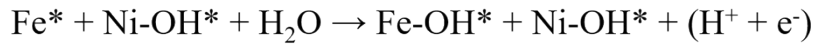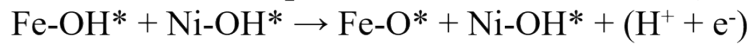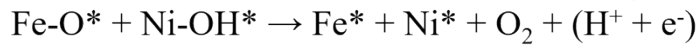

(d)

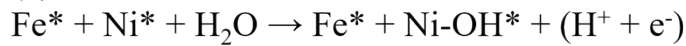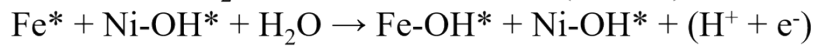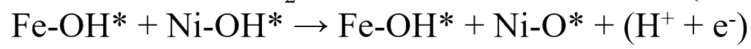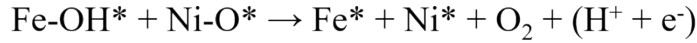

**Fig. S28** Possible response pathways for the dual sites of OER in NiOOH/FeOOH: (a) pathway 1, (b) pathway 2, (c) pathway 3 and (d) pathway 4. Where \* represents the active site and OH\*, (OH\*+OH\*), and (O\*+OH\*) are adsorbed intermediates.



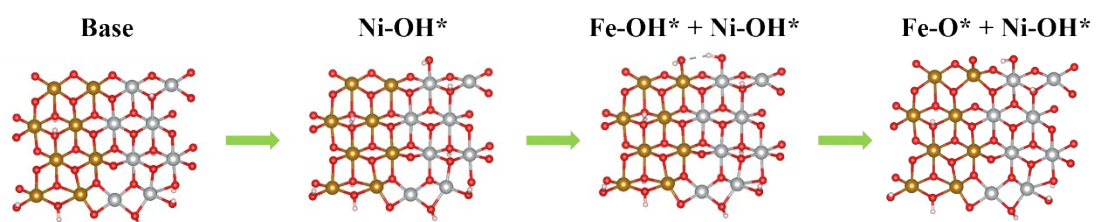

**Fig. S29** Side view of the NiOOH/FeOOH model and the adsorbed OH\*, O\* and OOH\* intermediates on the Fe-Ni dual site 2 of NiOOH/FeOOH model (Silvery balls: Ni atoms; Brown balls: Fe atoms; Red balls: O atoms; White balls: H atoms).

TOF:

According to the following formula, we have calculated the number of active sites:

$$\left( \frac{5 \times 0.005 \times 4.59\% \times 10^{-3} \text{ mg}}{55.8 \text{ g/mol}} + \frac{5 \times 0.005 \times 4.22\% \times 10^{-3} \text{ mg}}{58.7 \text{ g/mol}} \right) \times 6.02 \times 10^{23} \frac{1}{\text{mol}} = 2.32 \times 10^{16} \text{ sites cm}^{-2}$$

According to the following formula, we have calculated the amount of hydrogen turnover from OER current density:

$$O_2 = \left( j \frac{\text{mA}}{\text{cm}^2} \right) \left( \frac{1 \text{ C/s}}{1000 \text{ mA}} \right) \left( \frac{1 \text{ mole}^{-1}}{96485.3 \text{ C}} \right) \left( \frac{1 \text{ mol H}_2}{4 \text{ mole}^{-1}} \right) \left( \frac{6.02 \times 10^{23} \text{ molecules H}_2}{1 \text{ mol H}_2} \right) = 1.56 \times 10^{15} \frac{\text{H}_2/\text{s}}{\text{cm}^2} \text{ per } \frac{\text{mA}}{\text{cm}^2}$$

For OER: at the overpotential of 300 mV, the calculated TOF value was:

$$TOF = \frac{1.56 \times 10^{15} \frac{\text{H}_2/\text{s}}{\text{cm}^2} \text{ per } \times 57.04 \frac{\text{mA}}{\text{cm}^{-2}}}{2.32 \times 10^{16} \text{ sites cm}^{-2}} = 3.84 \text{ s}^{-1}$$

**Tabel S1** Content of elements in ICP of Fe<sub>5</sub>Ni<sub>5</sub>-MOG samples.

| <b>Element</b> | <b>Content (%)</b> |
|----------------|--------------------|
| <b>Fe</b>      | <b>4.586</b>       |
| <b>Ni</b>      | <b>4.218</b>       |

**Table S2** Comparison for OER activity of catalysts of some OER electrocatalysts already reported and our work (1 M KOH).

| Reference        | Sample                                                    | $\eta_{10}$<br>(mV) | Tafel slope<br>(mV dec <sup>-1</sup> ) | BET<br>(m <sup>2</sup> g <sup>-1</sup> ) | Substrate      |
|------------------|-----------------------------------------------------------|---------------------|----------------------------------------|------------------------------------------|----------------|
| <b>This work</b> | <b>Re-Fe<sub>5</sub>Ni<sub>5</sub>-MOG</b>                | <b>205</b>          | <b>58</b>                              | <b>139.11</b>                            | <b>GCE</b>     |
| <b>9</b>         | <b>NiFe-LDH</b>                                           | <b>350</b>          | <b>47</b>                              | <b>60</b>                                | <b>GCE</b>     |
| <b>10</b>        | <b>Co<sub>0.5</sub>V<sub>0.5</sub>@COF-SO<sub>3</sub></b> | <b>318</b>          | <b>62</b>                              | <b>184</b>                               | <b>CFP</b>     |
| <b>11</b>        | <b>Co-Mac-1</b>                                           | <b>320</b>          | <b>54</b>                              | <b>40.2</b>                              | <b>CFP</b>     |
| <b>12</b>        | <b>CCOP<sub>TDP</sub>-FeNi-SiO<sub>2</sub></b>            | <b>310</b>          | <b>57</b>                              | <b>-</b>                                 | <b>RRDE</b>    |
| <b>13</b>        | <b>NiFe-NiCoO<sub>2.0</sub></b>                           | <b>286</b>          | <b>49.3</b>                            | <b>-</b>                                 | <b>CFP</b>     |
| <b>14</b>        | <b>NiFe NRAs</b>                                          | <b>305</b>          | <b>54</b>                              | <b>14.42</b>                             | <b>Ni NRAs</b> |
| <b>15</b>        | <b>FeCoNi MnO<sub>2.0</sub>/CFP</b>                       | <b>390</b>          | <b>104.4</b>                           | <b>-</b>                                 | <b>CFP</b>     |
| <b>16</b>        | <b>CoNi@Fe(OH)<sub>3</sub>-NF</b>                         | <b>310</b>          | <b>106.4</b>                           | <b>-</b>                                 | <b>NF</b>      |
| <b>17</b>        | <b>15% PANI/ZIF-67</b>                                    | <b>340</b>          | <b>37</b>                              | <b>-</b>                                 | <b>RDE</b>     |
| <b>18</b>        | <b>PHI-Co<sub>0.5</sub></b>                               | <b>324</b>          | <b>44</b>                              | <b>-</b>                                 | <b>RDE</b>     |
| <b>19</b>        | <b>A<sub>2.7</sub>B-MOF-FeCo<sub>1.6</sub></b>            | <b>288</b>          | <b>39</b>                              | <b>-</b>                                 | <b>GCE</b>     |

**Table S3** Comparison for turnover frequency (TOF) of some OER electrocatalysts

already reported and our work (1 M KOH).

| Reference | Sample                                                  | Overpotential (mV) | TOF (s <sup>-1</sup> ) |
|-----------|---------------------------------------------------------|--------------------|------------------------|
| This work | Re-Fe <sub>5</sub> Ni <sub>5</sub> -MOG                 | 205                | 3.84                   |
| 20        | a-NiFeOOH/N-CFP                                         | 270                | 0.99                   |
| 21        | CoO@NiFe LDH/NF                                         | 350                | 0.59                   |
| 22        | FeCoNiP                                                 | 350                | 0.95                   |
| 9         | NiFe-LDH                                                | 300                | 0.08                   |
| 10        | Co <sub>0.5</sub> V <sub>0.5</sub> @COF-SO <sub>3</sub> | 300                | 0.098                  |

**Table S4** The free energy change ( $\Delta G$ ) of each elementary reaction for OER on different catalysts.

| Models | Sites             | $\Delta G1$ (eV) | $\Delta G2$ (eV) | $\Delta G3$ (eV) | $\Delta G4$ (eV) |
|--------|-------------------|------------------|------------------|------------------|------------------|
| NiOOH  | Ni site           | 1.58             | 1.56             | 1.81             | -0.03            |
| NiOOH/ | Fe-Ni dual site 1 | 1.06             | 1.38             | 1.54             | 0.93             |

|              |                          |             |             |             |             |
|--------------|--------------------------|-------------|-------------|-------------|-------------|
| <b>FeOOH</b> | <b>Fe-Ni dual site 2</b> | <b>1.34</b> | <b>1.10</b> | <b>1.54</b> | <b>0.93</b> |
|--------------|--------------------------|-------------|-------------|-------------|-------------|

## References

- 1 Y. X. Wang, Z. Y. Li, J. Zhu, X. Q. Wang, L. L. Xu, A. Lachgar, J. J. Zhang, CrystEngComm, 2013, **15**, 6395-6402.
- 2 G. Kresse, J. Furthmüller, Phys. Rev. B, 1996, **54**, 11169.
- 3 P. E. Blöchl, Phys. Rev. B, 1994, **50**, 17953-17979.

- 4 B. Hammer, L. B. Hansen, and J. K. Nørskov, *Phys. Rev. B*, 1999, **59**, 7413-7421.
- 5 J. P. Perdew, K. Burke, M. Ernzerhof, *Phys. Rev. Lett.*, 1996, **77**, 3865-3868.
- 6 L. Goerigk, S. Grimme, *Phys. Chem. Chem. Phys.*, 2011, **13**, 6670-6688.
- 7 J. Neugebauer, M. Scheffler, *Phys. Rev. B*, 1992, **46**, 16067.
- 8 J. K. Nørskov, J. Rossmeisl, A. Logadottir, L. Lindqvist, J. R. Kitchin, T. Bligaard, H. Jónsson, *J. Phys. Chem. B*, 2004, **108**, 17886-17892.
- 9 K. Yan, T. Lafleur, J. Chai, C. Jarvis, *Electrochem. Commun.*, 2016, **62**, 24-28.
- 10 Z. Gao, Z. Yu, Y. Huang, X. He, X. Su, L. Xiao, Y. Yu, X. Huang, F. Luo, *J. Mater. Chem. A*, 2020, **8**, 5907-5912.
- 11 Q. Liu, Q. Wang, J. Wang, Z. Li, J. Liu, X. Sun, J. Li, Y. Lei, L. Dai, P. Wang, *Adv. Funct. Mater.*, 2020, **30**, 2000593.
- 12 J. Guo, T. Li, Q. Wang, N. Zhang, Y. Cheng, Z. Xiang, *Nanoscale*, 2019, **11**, 211-218.
- 13 R. Shi, J. Wang, Z. Wang, T. Li, Y. Song, *Journal of Energy Chemistry*, 2019, **33**, 74-80.
- 14 Y. Yan, H. Liu, C. Liu, Y. Zhao, S. Liu, D. Wang, M. Fritz, A. Ispas, A. Bund, P. Schaaf, X. Wang, *Applied Materials Today*, 2021, **25**, 101185.
- 15 Z. Ye, T. Li, G. Ma, Y. Dong, X. Zhou, *Adv. Funct. Mater.*, 2017, **27**, 1704083.
- 16 H. Jiu, H. Wei, C. Wang, S. Che, Z. Guo, Y. Han, Q. Xu, X. Yu, L. Zhang, *Int. J. Hydrogen Energy*, 2022, **47**, 33719-33727.
- 17 M. Khalid, A. Honorato, H. Varela, L. Dai, *Nano Energy*, 2018, **45**, 127-135.
- 18 M. Ye, S. Li, X. Zhao, N. Tarakina, C. Teutloff, W. Chow, R. Bittl, A. Thomas, *Adv. Mater.*, 2020, **32**, 1903942.
- 19 Z. Xue, Y. Li, Y. Zhang, W. Geng, B. Jia, J. Tang, S. Bao, H. Wang, Y. Fan, Z. Wei, Z. Zhang, Z. Ke, G. Li, C. Su, *Adv. Energy Mater.*, 2018, **8**, 1801564.
- 20 P. Thangavel, G. Kim, K. Kim, *J. Mater. Chem. A*, 2021, **9**, 14043-14051.
- 21 Z. Wang, J. Zhang, Q. Yu, H. Yang, X. Chen, X. Yuan, K. Huang, X. Xiong, *Chem. Eng. J.*, 2021, **410**, 128366.
- 22 J. Xu, J. Li, D. Xiong, B. Zhang, Y. Liu, K. Wu, I. Amorim, W. Li, L. Liu, *Chem. Sci.*, 2018, **9**, 3470-3476.
